# Supplementary material for: A survey of patients’ views from eight European countries of interpretive support from Specialists in Laboratory Medicine
Source: publisher site journal article supplement (doi:10.1515/cclm-2017-0080), 2017-01-01
Supplement: Supplementary file 1 [file cclm-2017-0080_suppl.docx]

**A survey of patients views from eight European countries of interpretive support from Specialists in Laboratory Medicine**

**Supplemental Table 1** Summary of patients’ answers.

| Country | Poland  n=100 | Serbia  n=100 | Netherlands  n=100 | Denmark  n=116 | Estonia  n=101 | Turkey  n=100 | Norway  n=367 | Czech Republic  n=100 | TOTAL  n=1084 |
| --- | --- | --- | --- | --- | --- | --- | --- | --- | --- |
| Question 1: The laboratory could send the results of the blood tests to you. What is your opinion? | | | | | | | | |  |
| Yes, % | 67 | 54 | 50 | 66 | 58 | 70 | 62 | 94 | 64 |
| No, % | 33 | 46 | 50 | 34 | 42 | 30 | 38 | 6 | 36 |
| Question 2: It often requires special knowledge to understand the results of the laboratory tests. You may therefore need extra information. What is your opinion? | | | | | | | | |  |
| Yes, I need additional information, % | 67 | 59 | 82 | 76 | 75 | 70 | 68 | 84 | 72 |
| No, I understand the results, % | 33 | 41 | 18 | 22 | 25 | 30 | 30 | 15 | 27 |
| N/A | 0 | 0 | 0 | 1 | 0 | 0 | 2 | 1 | 1 |
| Question 3: If you need additional information, how would you like to receive this? | | | | | | | | |  |
| Standard description, % | 79 | 45 | 63 | 63 | 52 | 76 | 65 | 66 | 64 |
| Refer to web-site, % | 16 | 24 | 33 | 34 | 33 | 24 | 26 | 34 | 28 |
| Not interested, % | 5 | 31 | 3 | 3 | 15 | 0 | 9 | 1 | 7 |
| Question 4: It maybe that you want to receive your report with results, but that the standard of information for you is not enough. A specialist from the laboratory could look at your results, and add a personal interpretative comment and explanation. Would you like to receive such a personal report? | | | | | | | | |  |
| Yes, % | 72 | 63 | 72 | 78 | 47 | 67 | 59 | 47 | 62 |
| No, % | 27 | 6 | 24 | 15 | 45 | 33 | 33 | 37 | 30 |
| N/A, % | 1 | 31 | 4 | 7 | 8 | 0 | 7 | 16 | 9 |
| Question 5: You want a personal commentary and explanation of a laboratory specialist. This extra service takes time, and therefore cannot be done free of charge. Would you be ready to pay extra for it? | | | | | | | | |  |
